# Supplementary material for: Enrichment of Total Flavonoids and Licochalcone A from Glycyrrhiza inflata Bat. Residue Based on a Combined Membrane–Macroporous Resin Process and a Quality-Control Study
Source: MDPI journal article supplement (doi:10.3390/molecules29102282), 2024-05-12
Supplement: s1 [file s1]

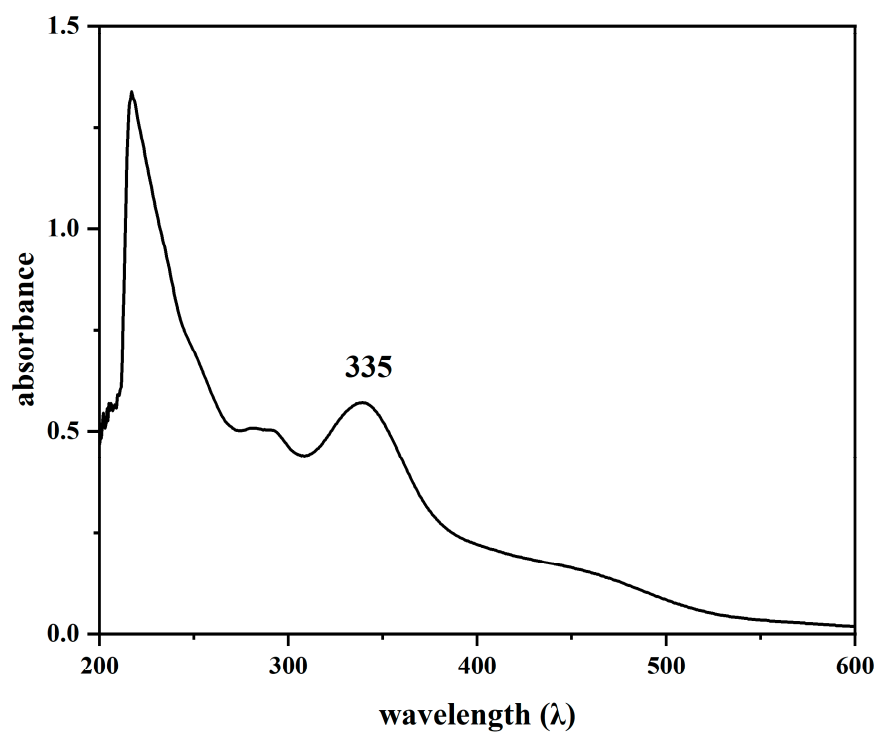

Supplemental Figure S1 UV spectrum of TFs in licorice residue

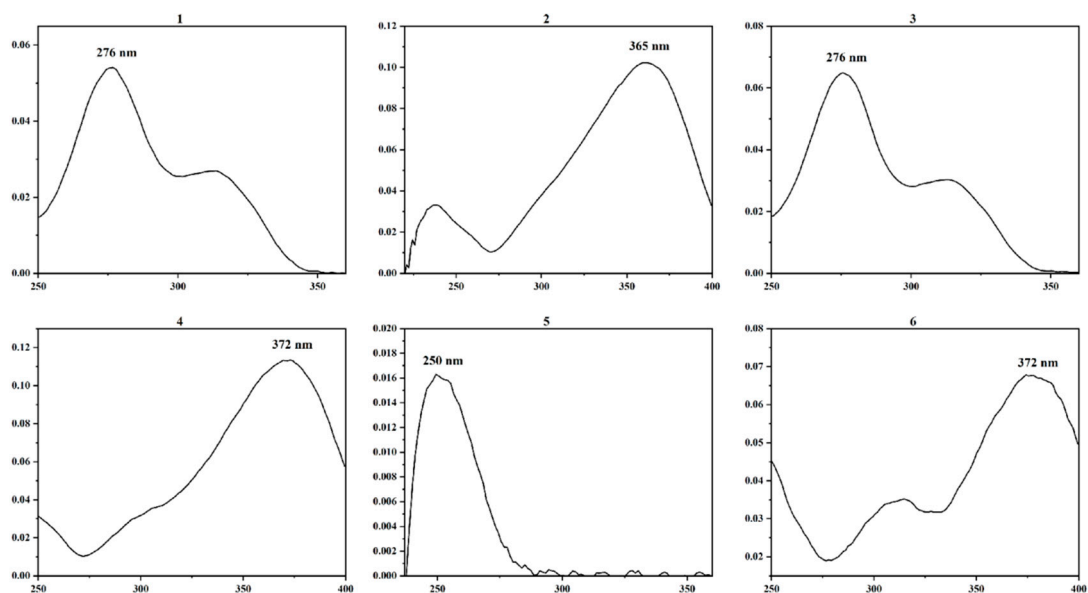

Supplemental Figure S2 UV-vis spectra of six components

(1: liquiritin; 2: isoliquiritin; 3: liquiritigenin; 4: isoliquiritigenin; 5: ammonium glycyrrhizinate; 6: licochalcone A)
